# Supplementary material
Source: PubMed Central journal article supplement (PMC9343261)

## Supplementary materials

**Table 1** Proportion of self-harm presentations out of all hospital emergency presentations  
(data available for 1,219 presentation in 2019 and 826 in 2020)

| <b>Area</b>   | <b>2019</b> | <b>2020</b> | <b>Total</b> |
|---------------|-------------|-------------|--------------|
| London        | 0.53        | 0.61        | 0.56         |
| Manchester    | 0.80        | 0.96        | 0.86         |
| Home counties | 0.57        | 0.65        | 0.60         |
| Livingstone   | 0.58        | 0.55        | 0.57         |
| Edinburgh     | 0.72        | 0.75        | 0.73         |
| Dublin        | 0.54        | 0.64        | 0.59         |
| Cagliari      | 0.36        | 0.37        | 0.36         |
| Turin         | 0.67        | 0.62        | 0.64         |
| Vienna        | 0.20        | 0.28        | 0.23         |
| Budapest      | 0.29        | 0.44        | 0.33         |
| Belgrade      | 0.55        | 1.00        | 0.67         |
| Istanbul      | 0.33        | 0.60        | 0.45         |
| Muscat        | 0.73        | 0.67        | 0.70         |
| Dubai         | 0.54        | 0.50        | 0.53         |
| Total         | 0.50        | 0.57        | 0.53         |

**Table 2** Proportion of severe self-harm presentations out of all self-harm presentations (data available for 605 presentation in 2019 and 649 in 2020)

| <b>Area</b>   | <b>2019</b> | <b>2020</b> | <b>Total</b> |
|---------------|-------------|-------------|--------------|
| London        | 0.15        | 0.18        | 0.16         |
| Manchester    | 0.31        | 0.30        | 0.30         |
| Home counties | 0.19        | 0.15        | 0.17         |
| Livingstone   | 0.33        | 0.13        | 0.26         |
| Edinburgh     | 0.16        | 0.39        | 0.24         |
| Dublin        | 0.08        | 0.15        | 0.11         |
| Cagliari      | 0.32        | 0.50        | 0.38         |
| Turin         | 0.11        | 0.25        | 0.18         |
| Vienna        | 0.00        | 0.04        | 0.02         |
| Budapest      | 0.00        | 0.25        | 0.10         |
| Belgrade      | 0.75        | 0.63        | 0.70         |
| Istanbul      | 0.50        | 0.17        | 0.30         |
| Muscat        | 0.00        | 0.38        | 0.16         |
| Dubai         | 0.29        | 0.50        | 0.33         |
| Total         | 0.19        | 0.19        | 0.19         |

**Table 3** Proportion of children and adolescents with emotional disorders out of all self-harm presentations (data available for 520 presentation in 2019 and 384 in 2020)

| <b>Area</b>   | <b>2019</b> | <b>2020</b> | <b>Total</b> |
|---------------|-------------|-------------|--------------|
| London        | 0.52        | 0.67        | 0.58         |
| Manchester    | 0.46        | 0.67        | 0.56         |
| Home counties | 0.83        | 0.88        | 0.85         |
| Livingstone   | 0.40        | 0.57        | 0.46         |
| Edinburgh     | 0.38        | 0.17        | 0.30         |
| Dublin        | 0.81        | 0.90        | 0.85         |
| Cagliari      | 0.58        | 0.80        | 0.66         |
| Turin         | 0.88        | 0.57        | 0.73         |
| Vienna        | 0.40        | 0.49        | 0.45         |
| Budapest      | 0.83        | 1.00        | 0.90         |
| Belgrade      | 0.83        | 0.88        | 0.85         |
| Istanbul      | 1.00        | 0.83        | 0.90         |
| Muscat        | 0.27        | 0.25        | 0.26         |
| Dubai         | 0.71        | 1.00        | 0.78         |
| Total         | 0.58        | 0.66        | 0.61         |

**Table 4** Proportion of children and adolescents admitted to observation wards out of all children and adolescents with self-harm presentations (data available for 548 presentation in 2019 and 422 in 2020)

| <b>Area</b>   | <b>2019</b> | <b>2020</b> | <b>Total</b> |
|---------------|-------------|-------------|--------------|
| London        | 0.34        | 0.18        | 0.27         |
| Manchester    | 0.41        | 0.37        | 0.39         |
| Home counties | 0.04        | 0.03        | 0.04         |
| Livingstone   | 0.02        | 0.03        | 0.03         |
| Edinburgh     | 0.02        | 0.08        | 0.04         |
| Dublin        | 0.00        | 0.00        | 0.00         |
| Cagliari      | 0.26        | 0.00        | 0.17         |
| Turin         | 0.10        | 0.38        | 0.22         |
| Vienna        |             |             |              |
| Budapest      | 0.00        | 0.00        | 0.00         |
| Belgrade      | 0.00        | 0.00        | 0.00         |
| Istanbul      | 0.00        | 0.33        | 0.20         |
| Muscat        | 0.00        | 0.00        | 0.00         |
| Dubai         | 0.14        | 0.00        | 0.11         |
| Total         | 0.13        | 0.09        | 0.11         |

**Table 5** Characteristics of included hospitals

| <b>Hospital</b>                                                                 | <b>City</b> | <b>Country</b>      | <b>Observation ward (yes/no)</b> | <b>Multidisciplinary paediatric liaison team (yes/no)</b> | <b>Out-of-hours child/adolescent mental health assessment service (yes/no)</b> | <b>7-day follow-up after a presentation with self-harm required (yes/no)</b> |
|---------------------------------------------------------------------------------|-------------|---------------------|----------------------------------|-----------------------------------------------------------|--------------------------------------------------------------------------------|------------------------------------------------------------------------------|
| Temple Street Children's University Hospital                                    | Dublin      | Republic of Ireland | no                               | yes                                                       | yes                                                                            | no                                                                           |
| Royal Manchester Children's Hospital                                            | Manchester  | United Kingdom      | yes                              | yes                                                       | yes                                                                            | yes                                                                          |
| Dept. of Child and Adolescent Psychiatry, Medical University of Vienna          | Vienna      | Austria             | yes                              | no                                                        | yes                                                                            | no                                                                           |
| Clinic for Neurology and Psychiatry for Children and Youth                      | Belgrade    | Serbia              | no                               | no                                                        | yes                                                                            | no                                                                           |
| University of Turin - Child & Adolescent Neuropsychiatry                        | Turin       | Italy               | yes                              | yes                                                       | yes                                                                            | no                                                                           |
| Children's Health Ireland at Crumlin                                            | Dublin      | Republic of Ireland | no                               | no                                                        | no                                                                             | no                                                                           |
| Vadaskert Alapitvany                                                            | Budapest    | Hungary             | no                               | no                                                        | yes                                                                            | no                                                                           |
| University of Cagliari - Child & Adolescent Neuropsychiatry Unit, AOB, Cagliari | Cagliari    | Italy               | yes                              | yes                                                       | yes                                                                            | no                                                                           |
| Acibadem Mehmet Ali Aydınlar                                                    | Istanbul    | Turkey              | yes                              | yes                                                       | yes                                                                            | yes                                                                          |

|                                                                                                                                        |            |                |     |     |     |     |
|----------------------------------------------------------------------------------------------------------------------------------------|------------|----------------|-----|-----|-----|-----|
| University Medical Faculty, Atakent Hospital                                                                                           |            |                |     |     |     |     |
| CNWL NHS Foundation Trust - St Mary's Hospital, Chelsea and Westminster Hospital, Northwick Park Hospital and Hillingdon Hospital A&Es | London     | United Kingdom | yes | yes | yes | yes |
| Sultan Qaboos University Hospital & Al-Massara Hospital                                                                                | Muscat     | Oman           | no  | no  | yes | yes |
| Royal Edinburgh Hospital                                                                                                               | Edinburgh  | United Kingdom | no  | no  | yes | no  |
| Royal Infirmary of Edinburgh                                                                                                           | Edinburgh  | United Kingdom | yes | yes | yes | no  |
| Royal Hospital for Sick Children                                                                                                       | Edinburgh  | United Kingdom | no  | no  | yes | no  |
| St John's Hospital                                                                                                                     | Livingston | United Kingdom | Yes | no  | yes | no  |
| Lister Hospital                                                                                                                        | Stevenage  | United Kingdom | yes | yes | yes | yes |
| Watford General Hospital                                                                                                               | Watford    | United Kingdom | yes | yes | yes | yes |
| Berkshire Healthcare NHS Foundation Trust                                                                                              | Berkshire  | United Kingdom | yes | no  | yes | yes |
| Kings College Hospital, Paediatric Liaison Service, South London and Maudsley NHS                                                      | London     | United Kingdom | yes | yes | yes | yes |

|                                                                                                |        |                      |     |     |     |     |
|------------------------------------------------------------------------------------------------|--------|----------------------|-----|-----|-----|-----|
| Foundation Trust                                                                               |        |                      |     |     |     |     |
| St Thomas Hospital, Paediatric Liaison Service, South London and Maudsley NHS Foundation Trust | London | United Kingdom       | yes | yes | no  | yes |
| Croydon University Hospital                                                                    | London | United Kingdom       | no  | yes | yes | yes |
| Rashid Hospital, Dubai Hospital and Latifa hospital - Dubai Health Authority                   | Dubai  | United Arab Emirates | yes | yes | yes | no  |
| Lewisham University Hospital                                                                   | London | United Kingdom       | yes | yes | yes | yes |

**Figure 1** Forest plot illustrating year differences in the proportion of children and adolescents presenting with previous community self-harm in the entire sample

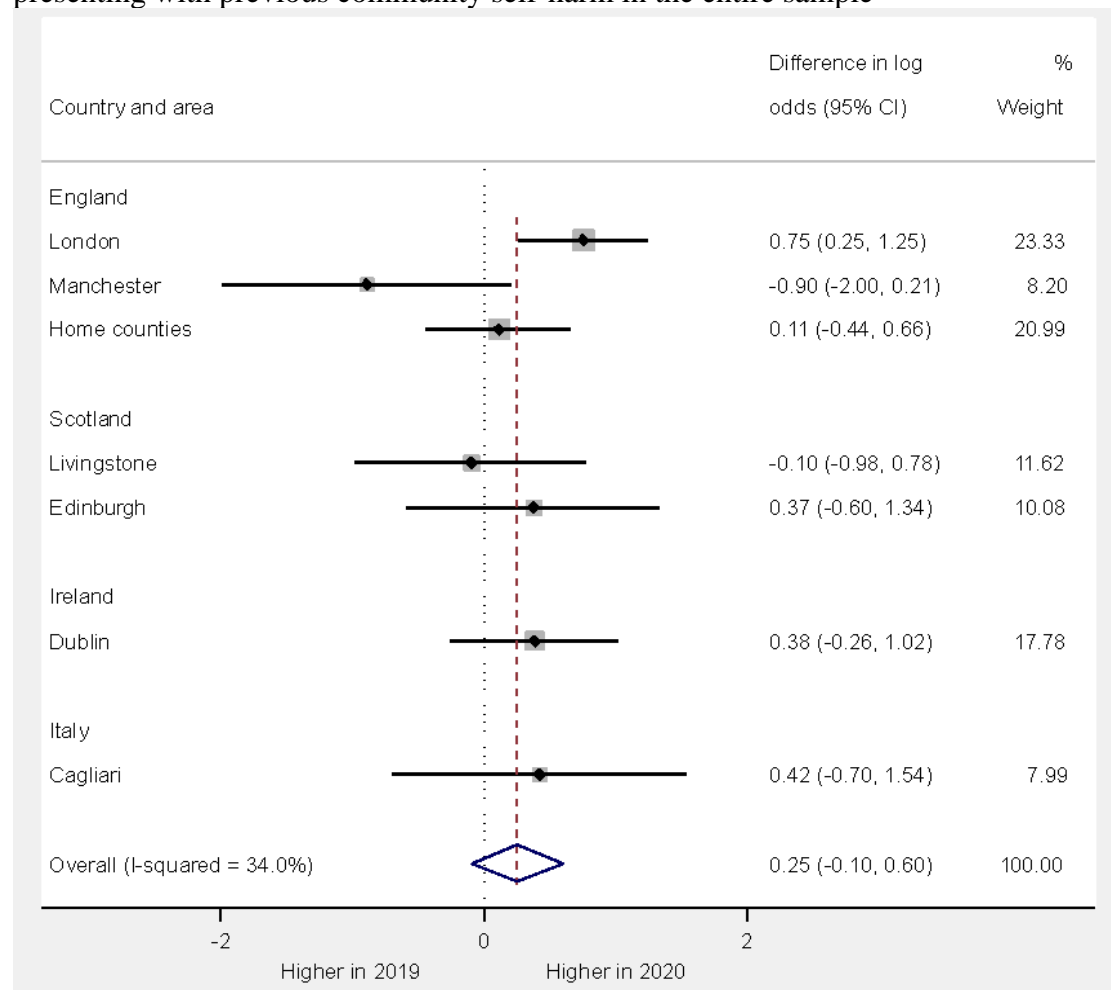



## SOCIODEMOGRAPHIC CHARACTERISTICS OF CHILDREN AND ADOLESCENTS PRESENTING WITH SELF HARM

**Figure 2** Forest plot illustrating year differences in the proportion of females in the sub-sample of children and adolescents presenting with self-harm

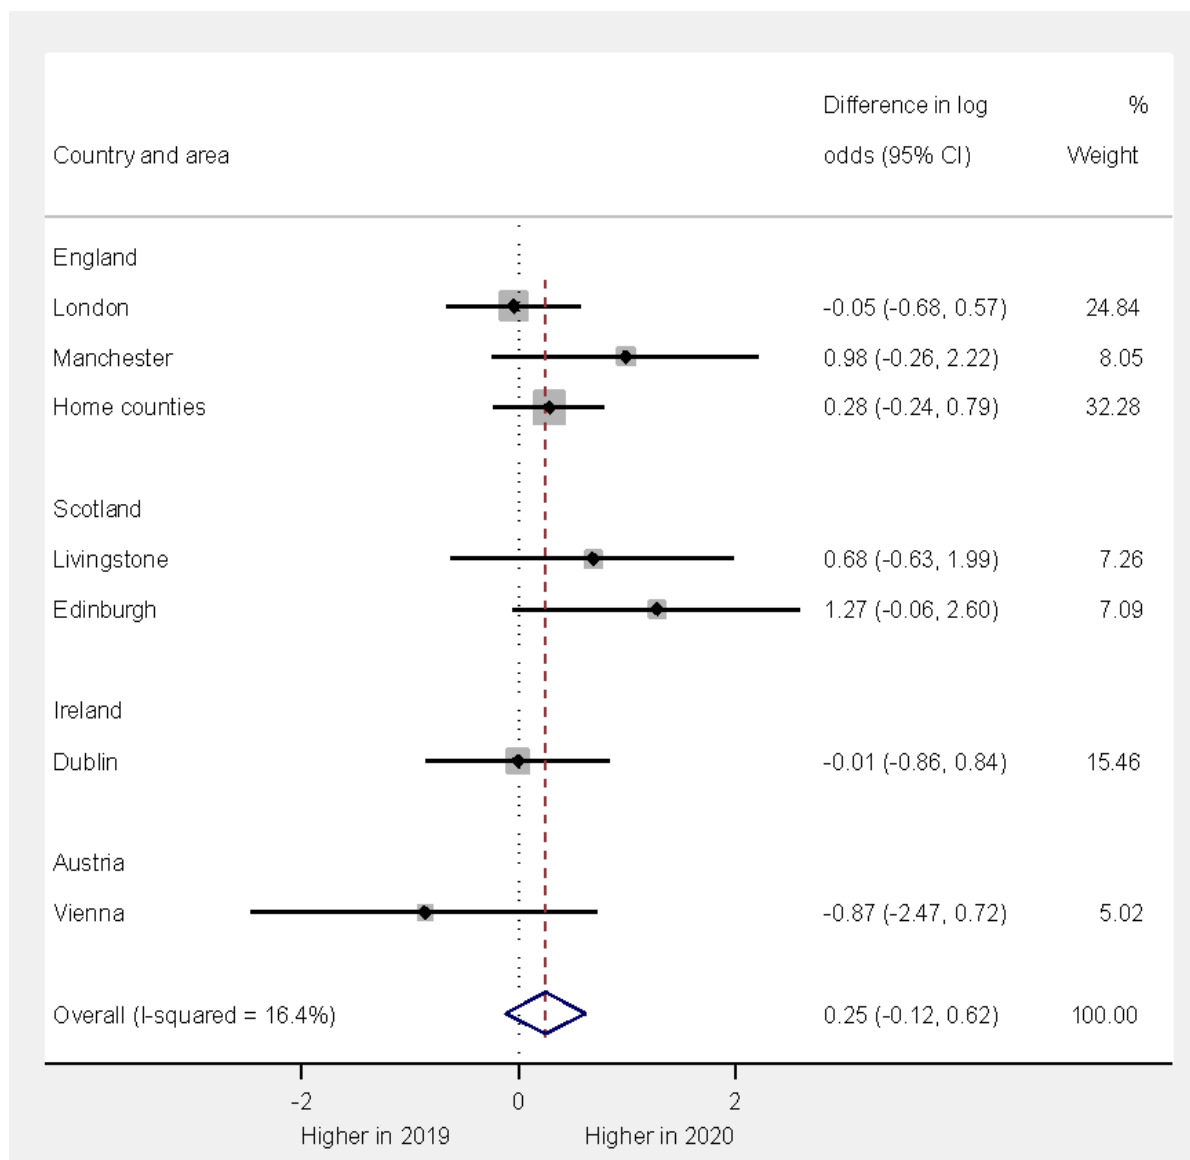

**Figure 3** Forest plot illustrating year differences in age in children and adolescents presenting with self-harm

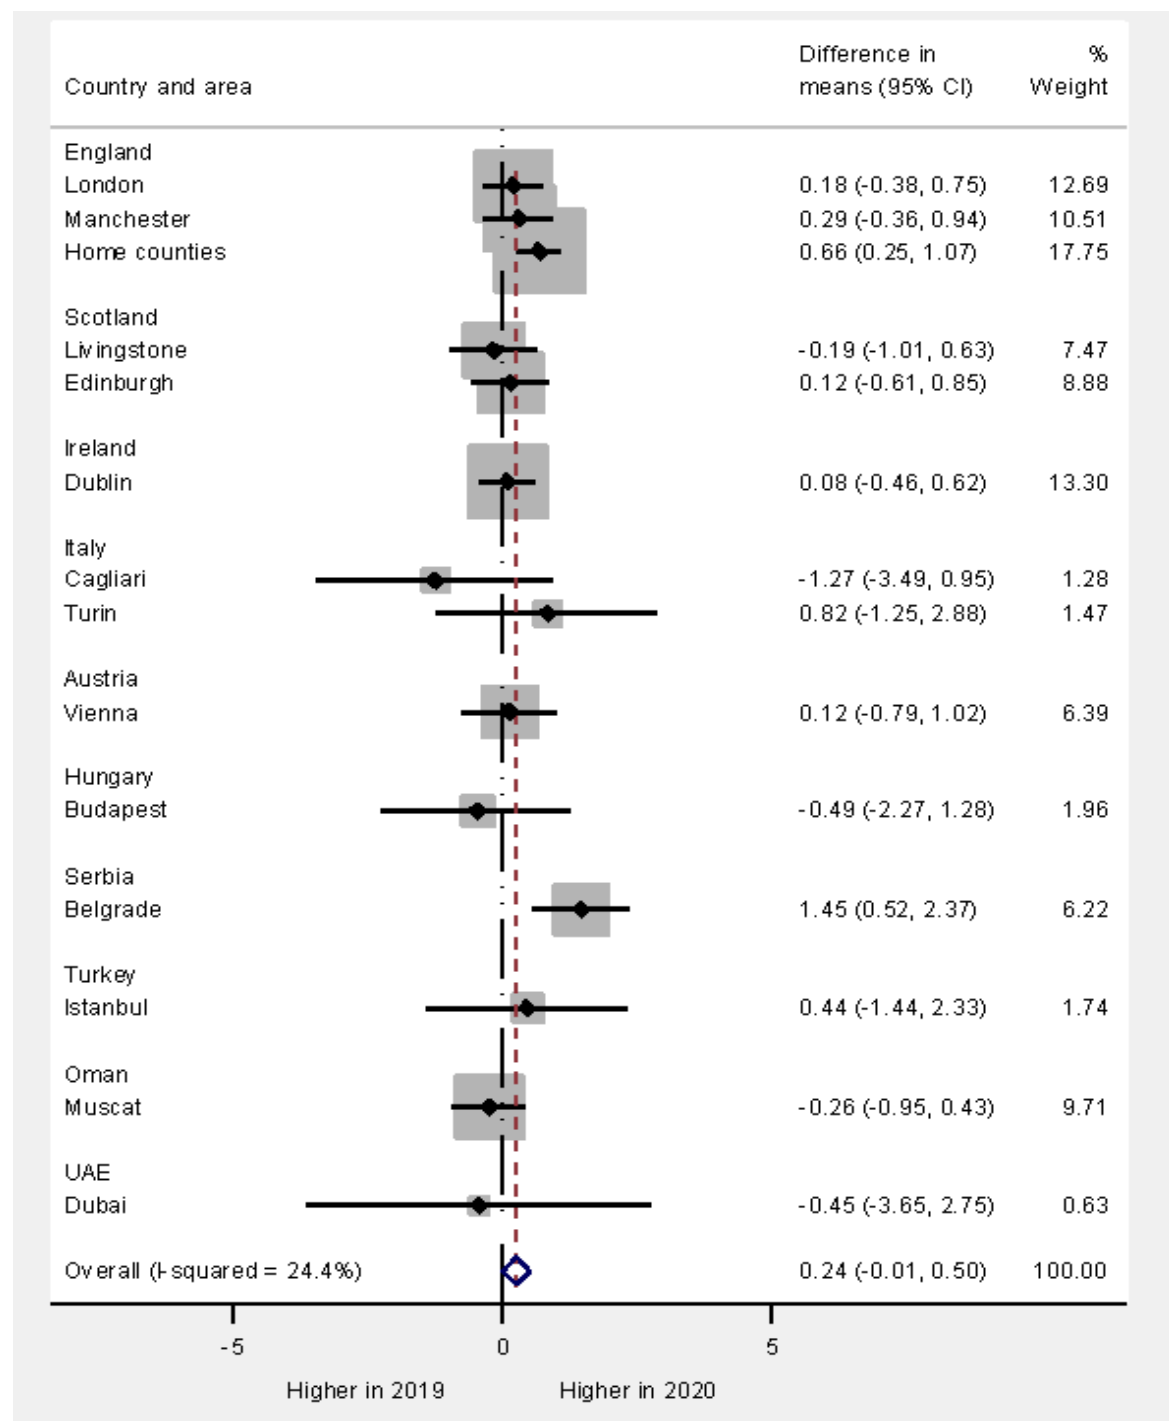

**Figure 4** Forest plot illustrating year differences in the proportion of children and adolescents from the dominant ethnic group in children and adolescents presenting with self-harm

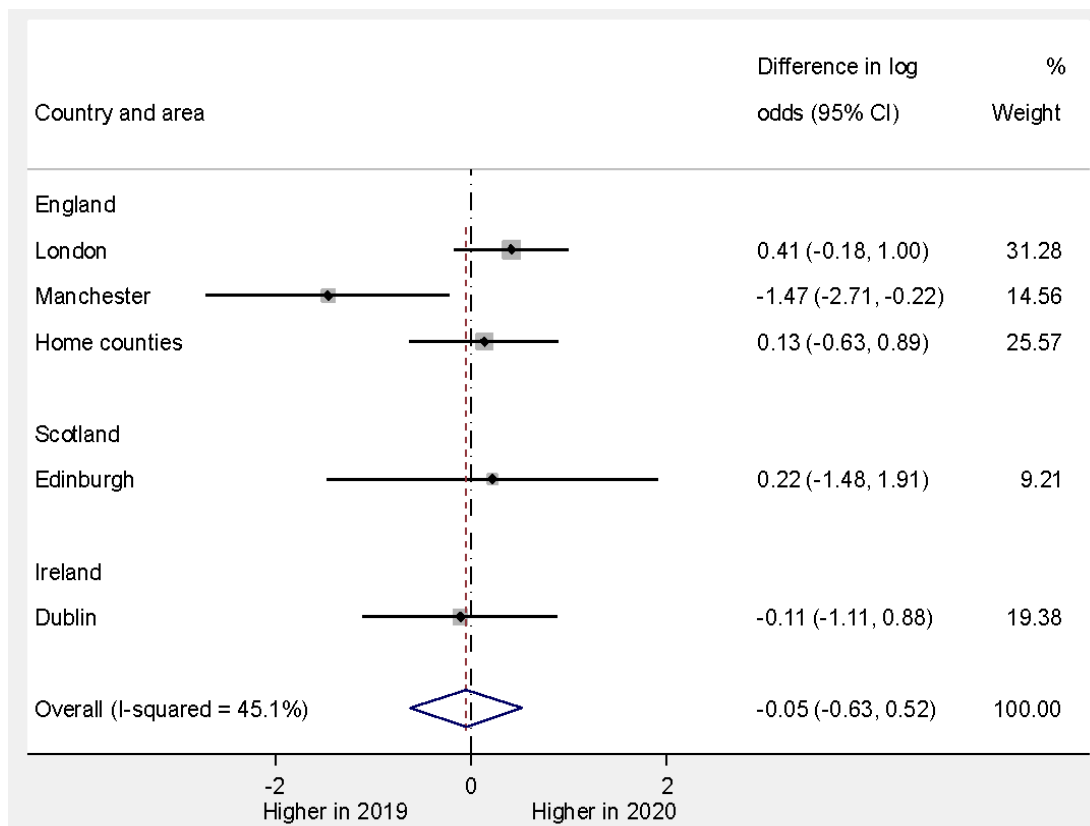

**Figure 5** Forest plot illustrating year differences in the deprivation decile in children and adolescents presenting with self-harm

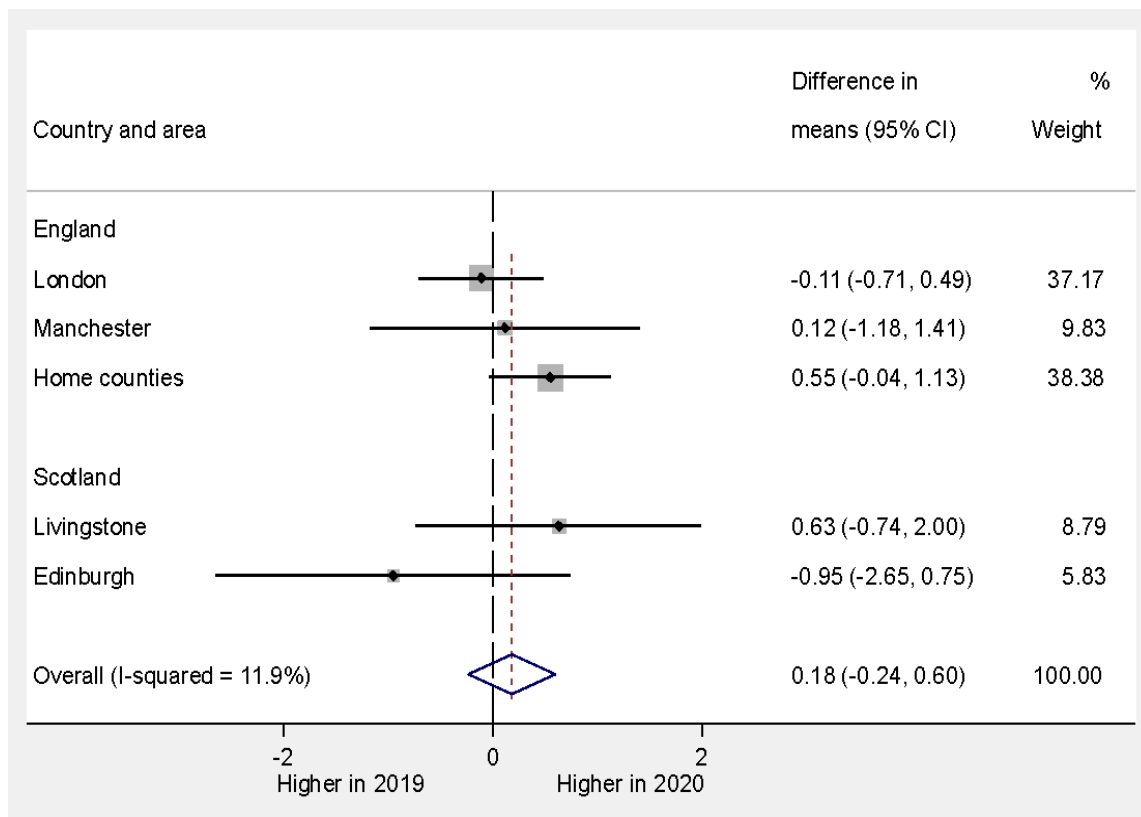

**Figure 6** Forest plot illustrating year differences in the proportion of children and adolescents in Education, Employment or Training (EET) out of all children and adolescents presenting with self-harm

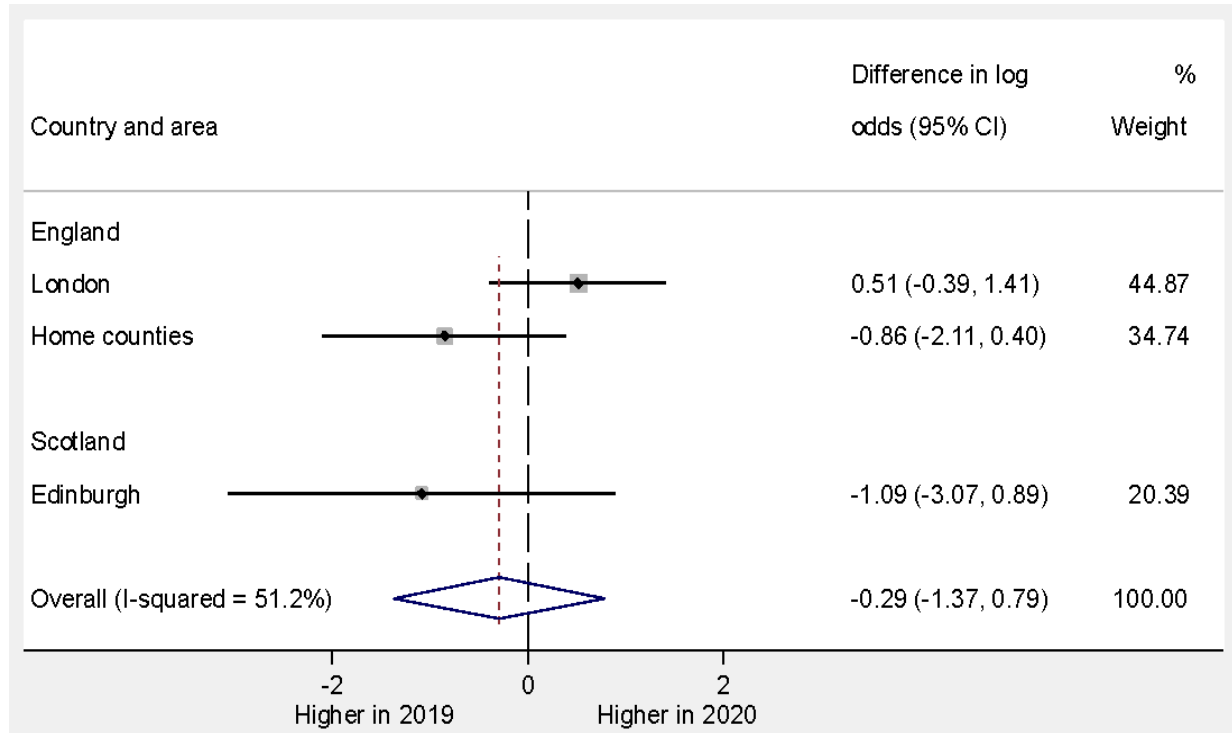

**Figure 7** Forest plot illustrating year differences in the proportion young people looked after by local authority out of all children and adolescents presenting with self-harm

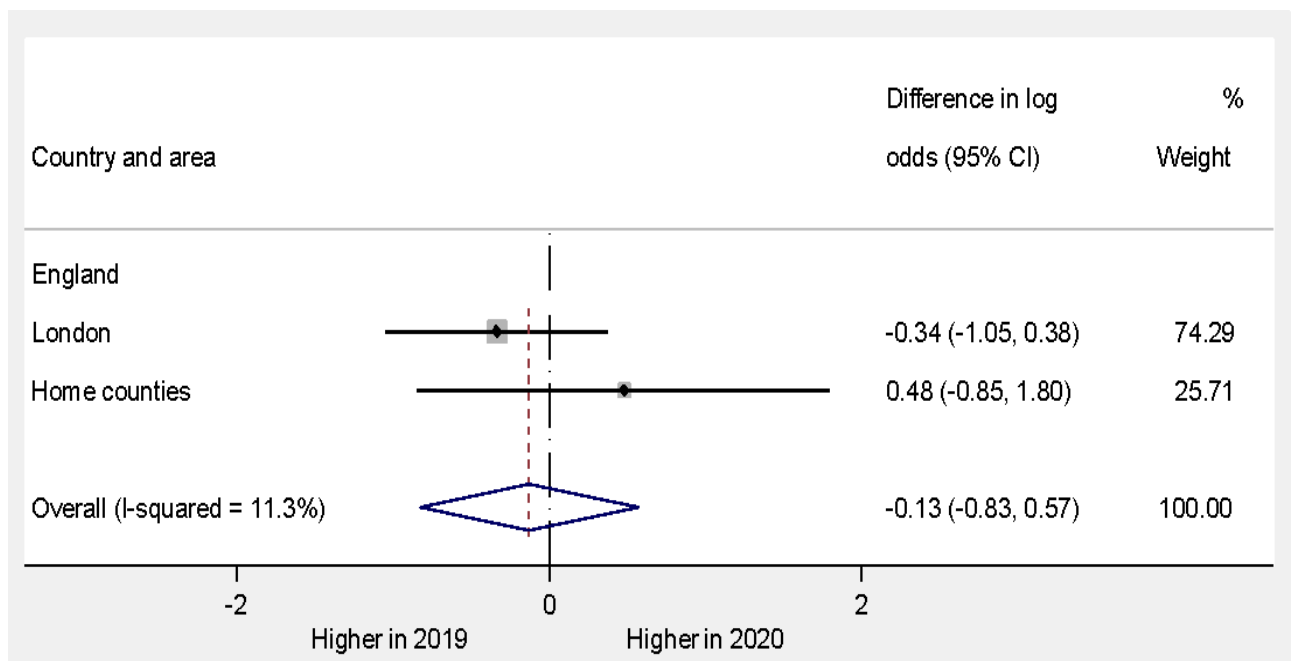

**Figure 8** Forest plot illustrating year differences in the proportion of children and adolescents whose parents live together out of all children and adolescents not looked after by local authority presenting with self-harm

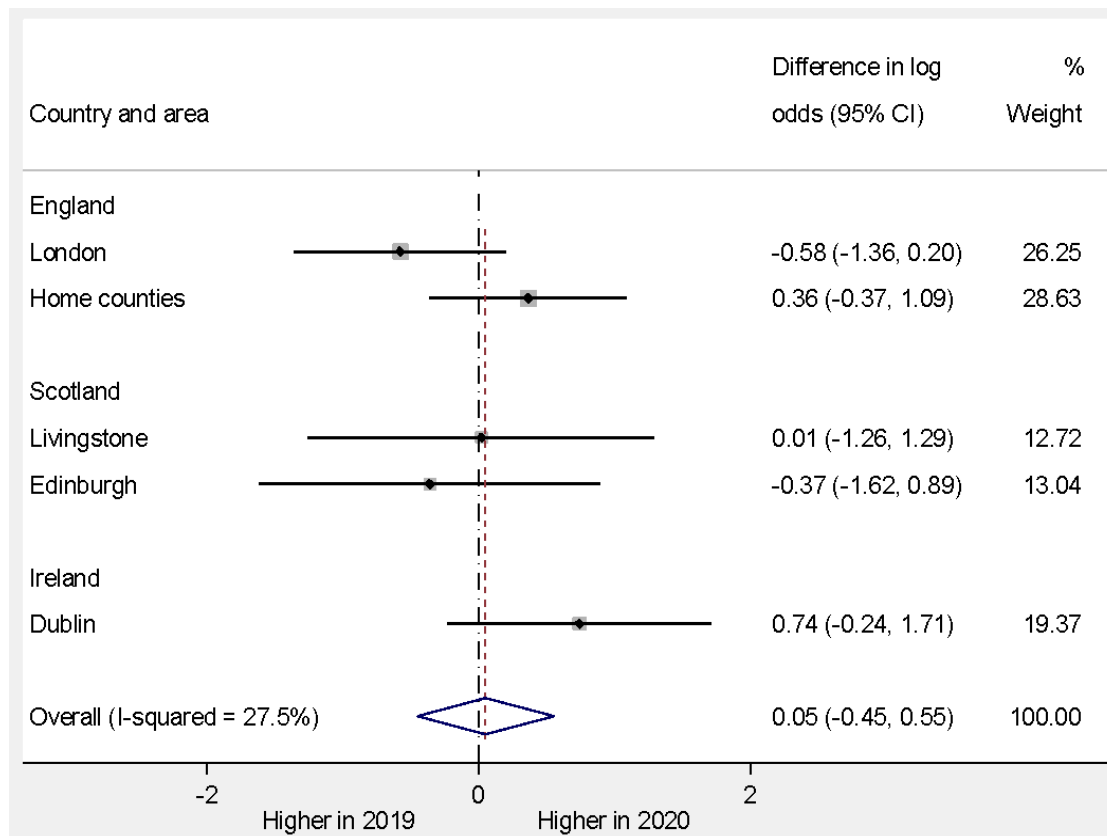

## CLINICAL CHARACTERISTICS OF CHILDREN AND ADOLESCENTS

### PRESENTING WITH SELF HARM: DIAGNOSIS

**Figure 9** Forest plot illustrating year differences in the diagnosis of a behavioural disorder in children and adolescents presenting with self-harm

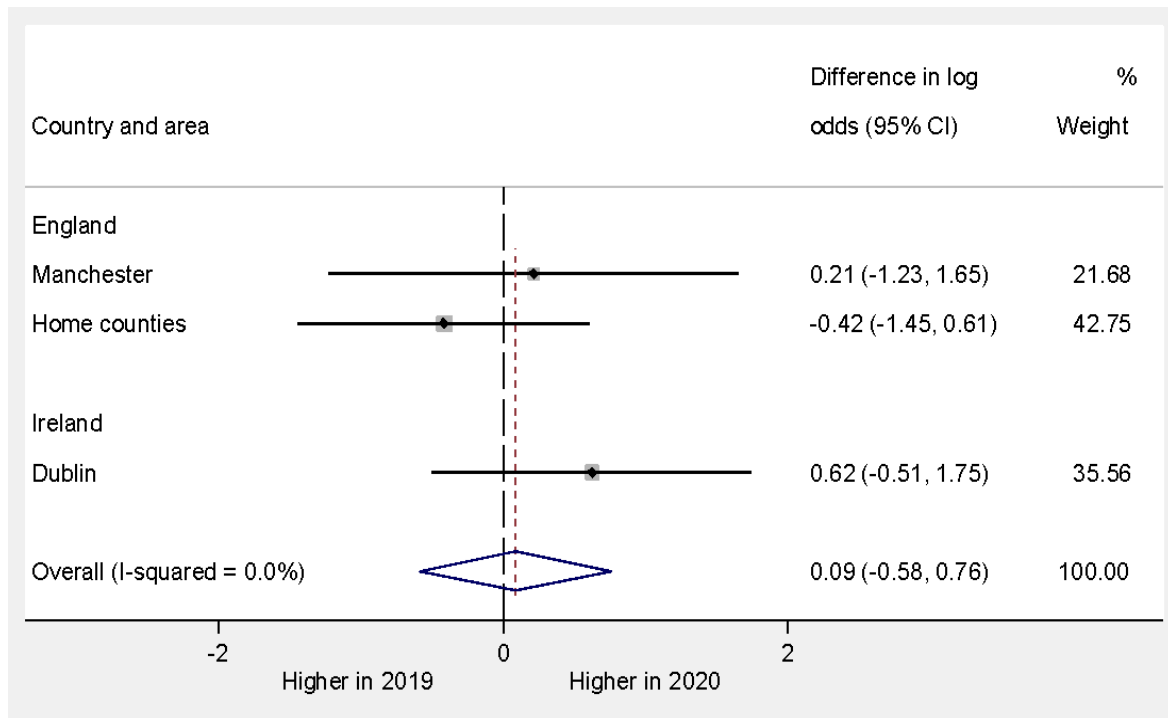



**Figure 10** Forest plot illustrating year differences in the diagnosis of a neurodevelopmental disorder in children and adolescents presenting with self-harm

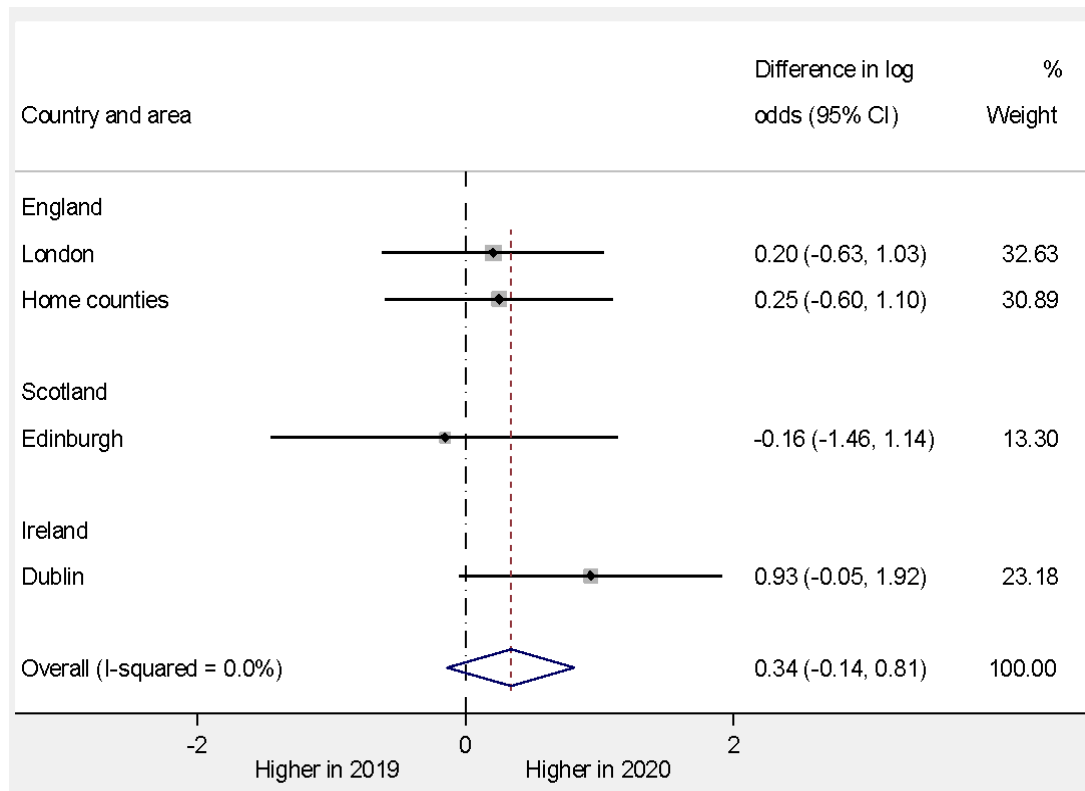

**Figure 11** Forest plot illustrating year differences in the diagnosis of a substance misuse disorder in children and adolescents presenting with self-harm

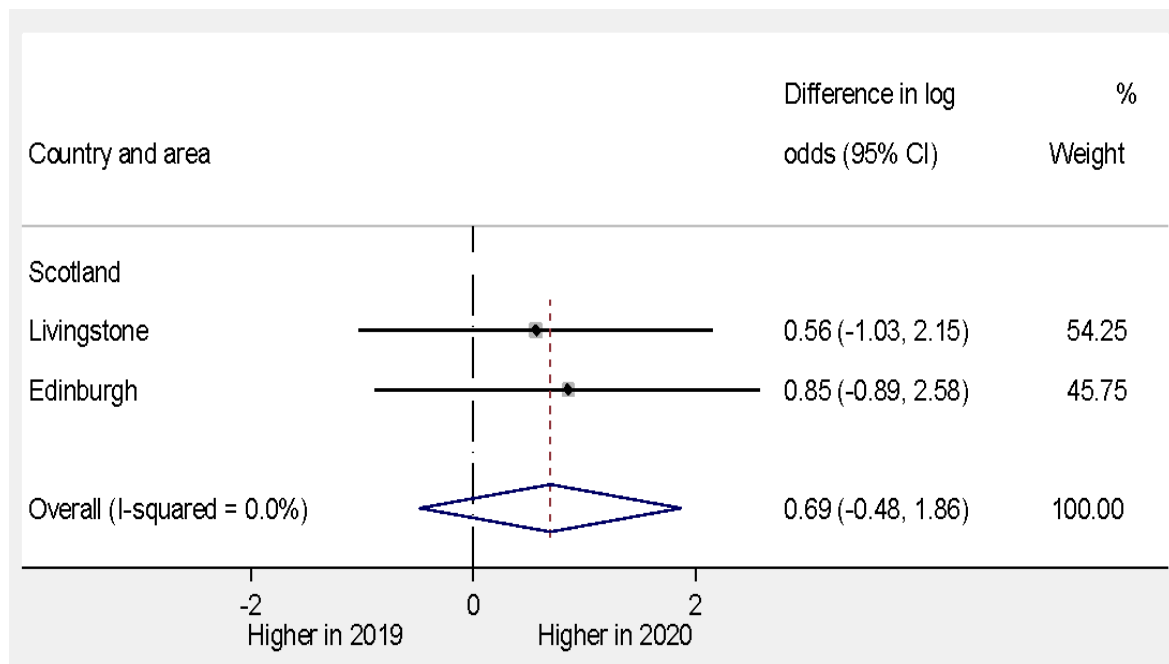

**Figure 12** Forest plot illustrating year differences in the diagnosis of a personality disorder in children and adolescents presenting with self-harm

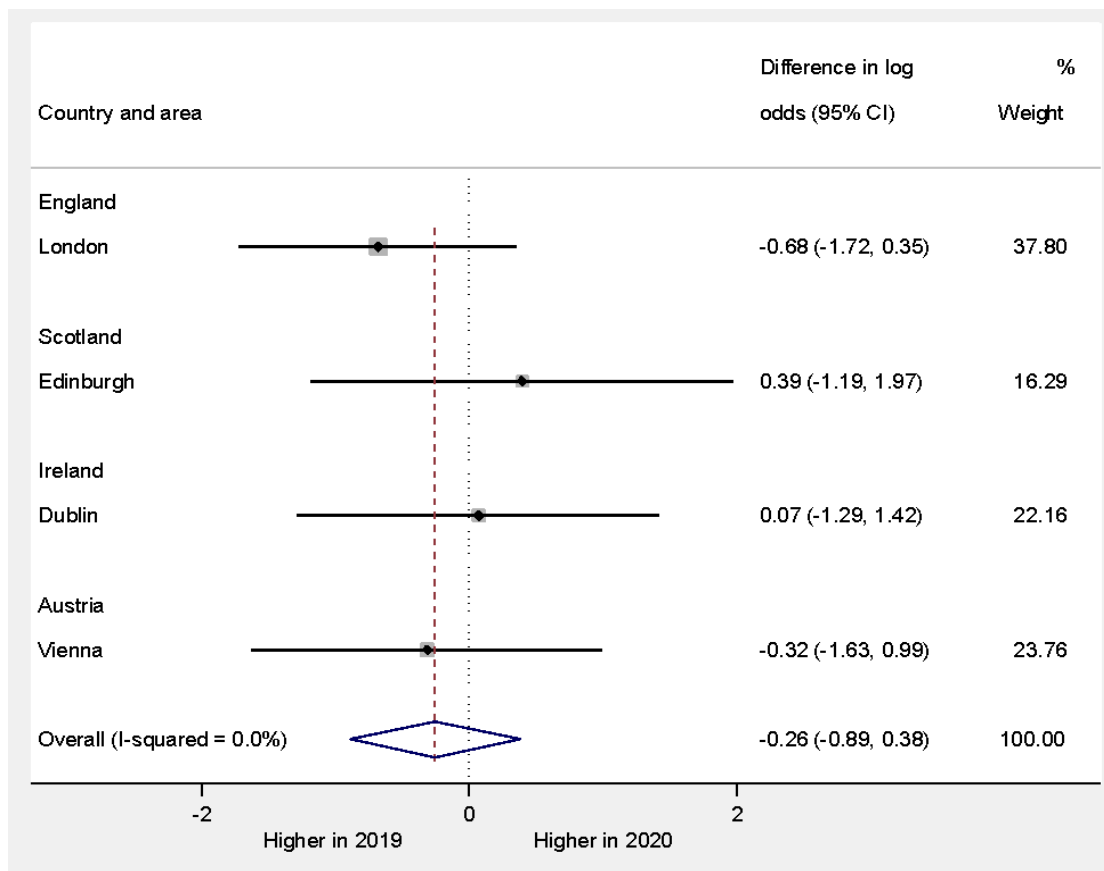

## CLINICAL CHARACTERISTICS OF CHILDREN AND ADOLESCENTS

### PRESENTING WITH SELF HARM: PROXIMAL RISK FACTORS

**Figure 13** Forest plot illustrating year differences in the proportion of children and adolescents who used a violent method for self-harm out of all children and adolescents presenting with self-harm

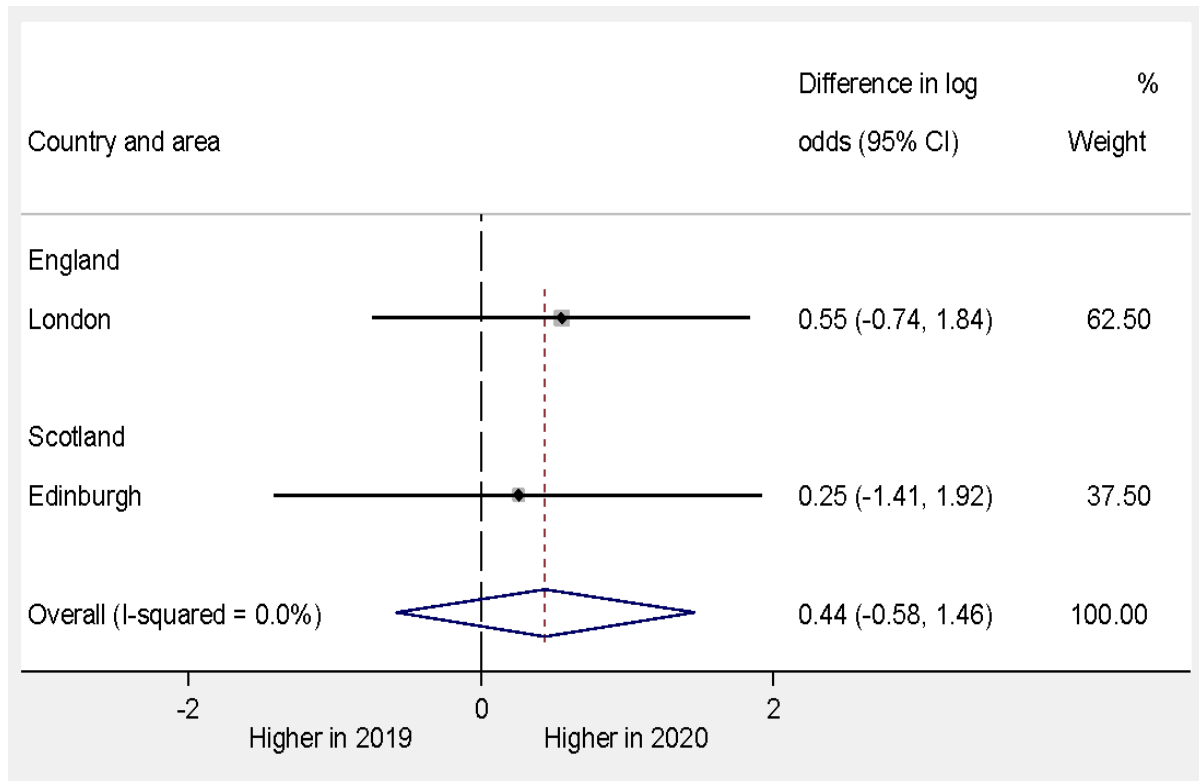

**Figure 14** Forest plot illustrating year differences in the proportion of children and adolescents who expressed suicide intent out of all children and adolescents presenting with self-harm

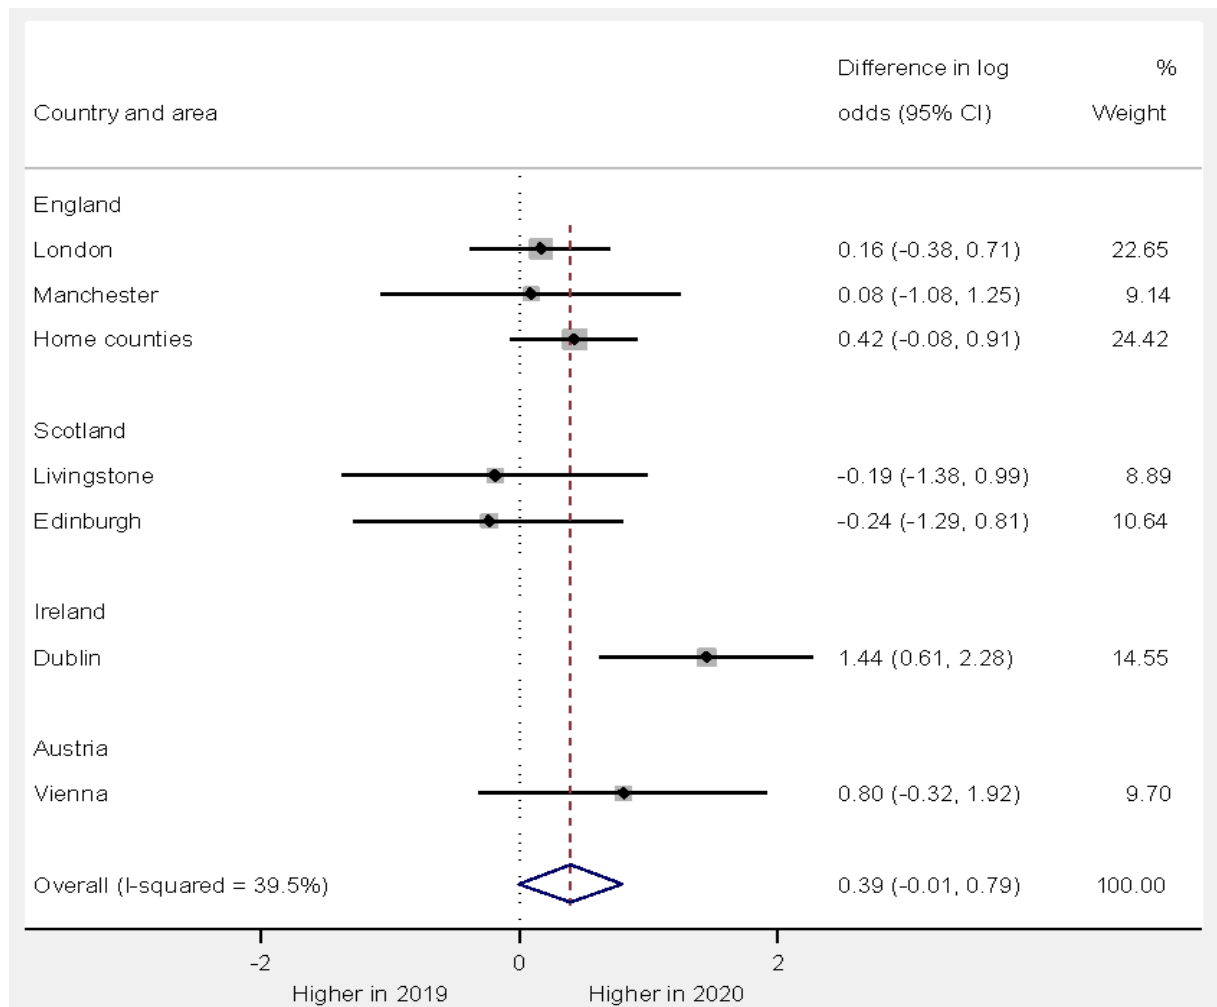

**Figure 15** Forest plot illustrating year differences in the proportion of children and adolescents whose self-harm was precipitated by a row with a family member

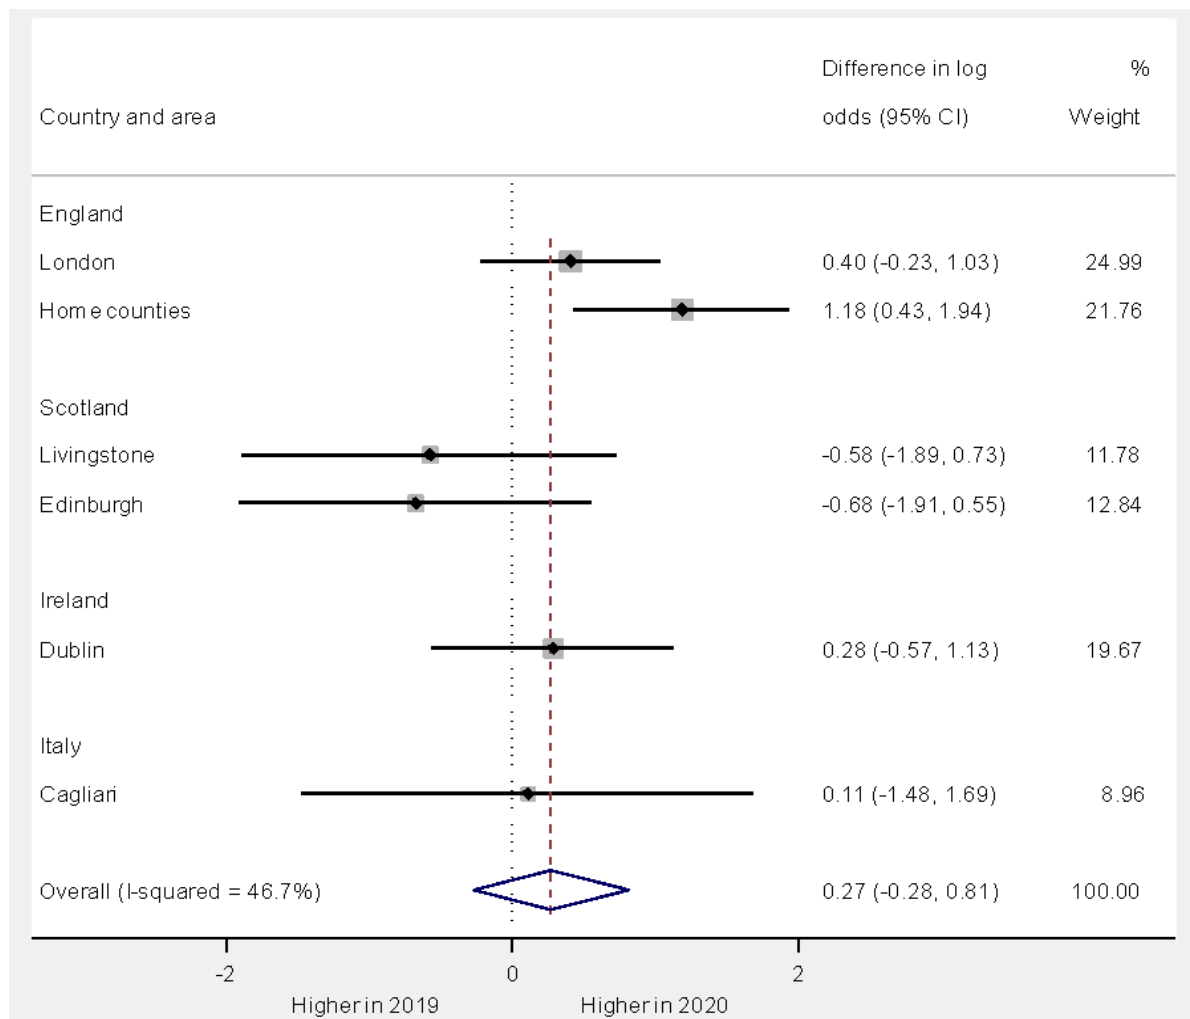

**Figure 16** Forest plot illustrating year differences in the proportion of children and adolescents whose self-harm was precipitated social isolation

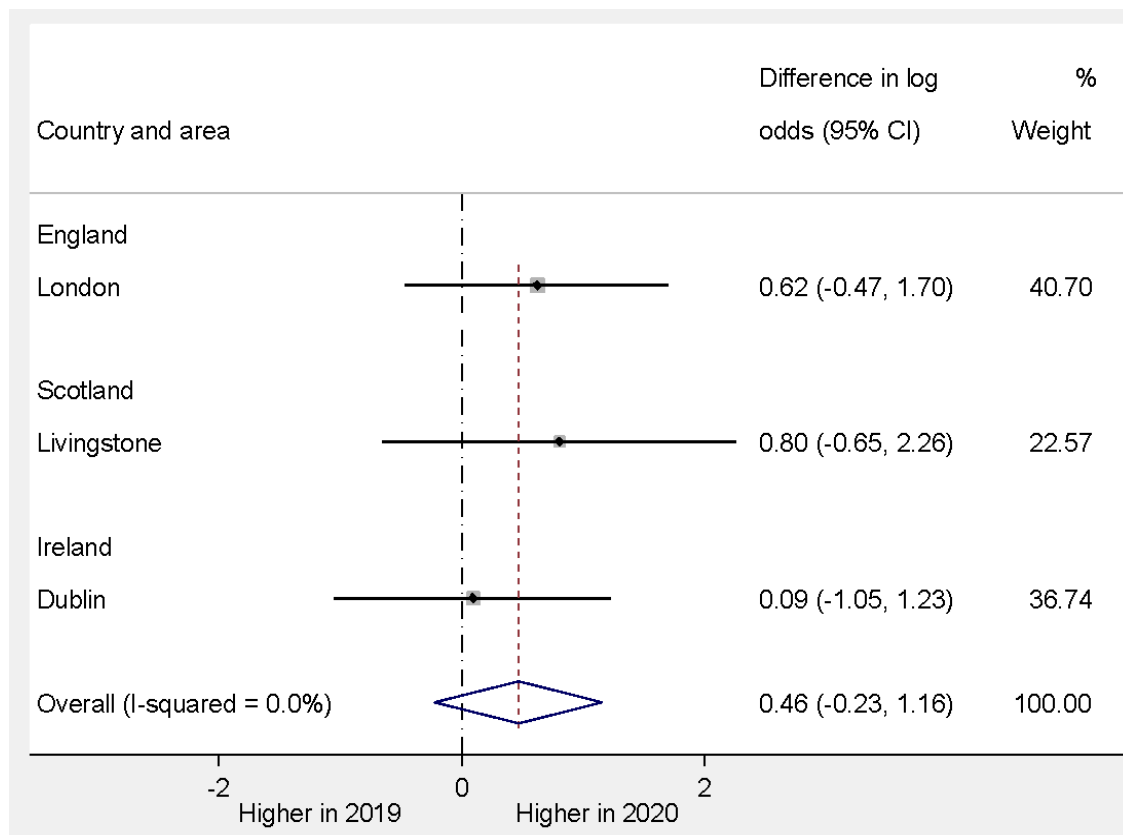

**Figure 17** Forest plot illustrating year differences in the proportion of children and adolescents who ingested alcohol at the time immediately before, during or after self-harm

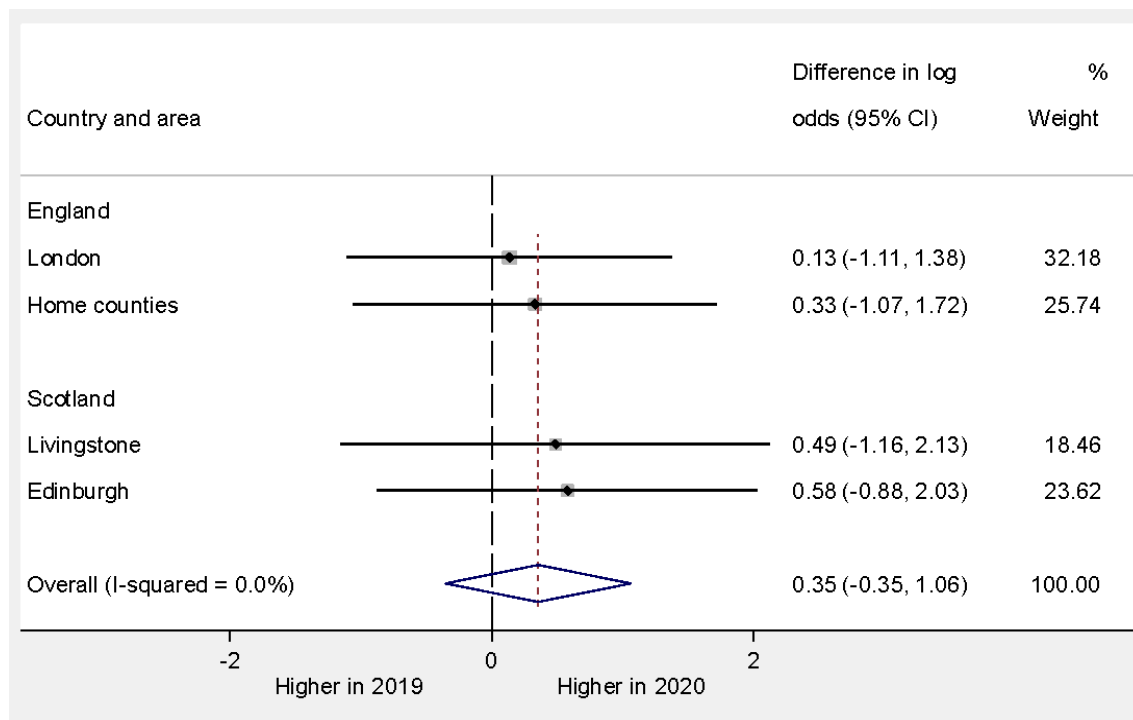



## CLINICAL CHARACTERISTICS OF CHILDREN AND ADOLESCENTS

### PRESENTING WITH SELF HARM: DISTAL RISK FACTORS

**Figure 18** Forest plot illustrating year differences in the proportion of children and adolescents with previous self-harm presentations to emergency hospital departments out of all children and adolescents presenting with self-harm

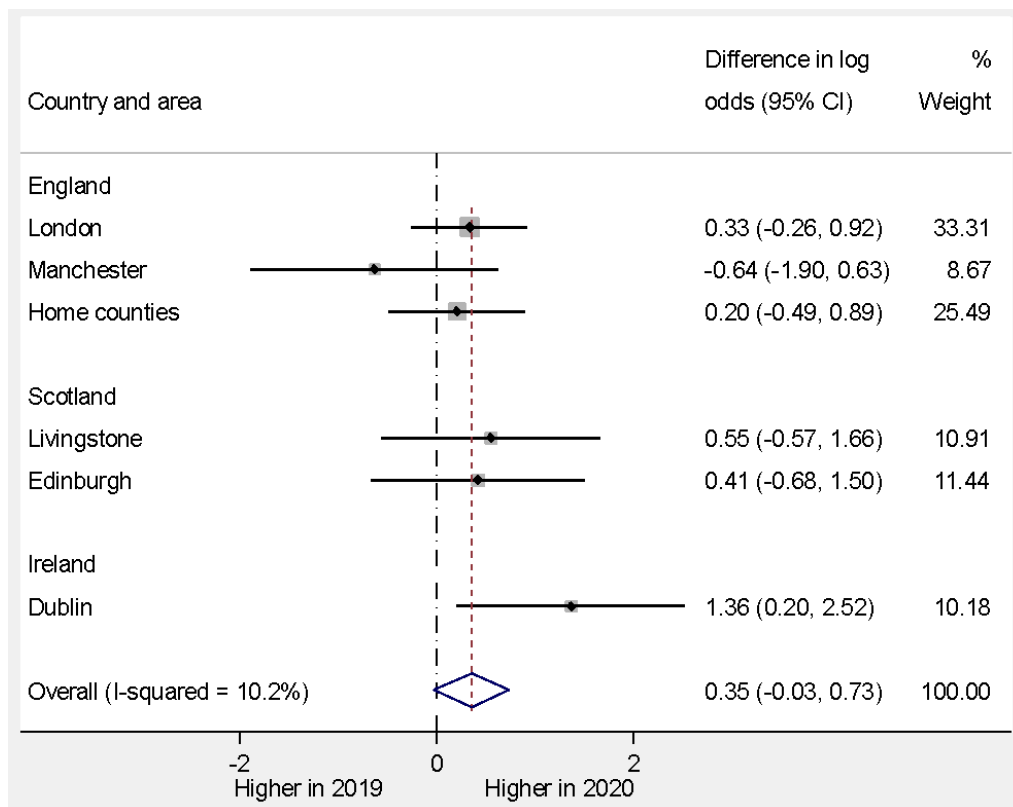

**Figure 19** Forest plot illustrating year differences in the proportion of children and adolescents with previous presentations to emergency hospital departments for any reason other than self-harm, out of all children and adolescents presenting with self-harm

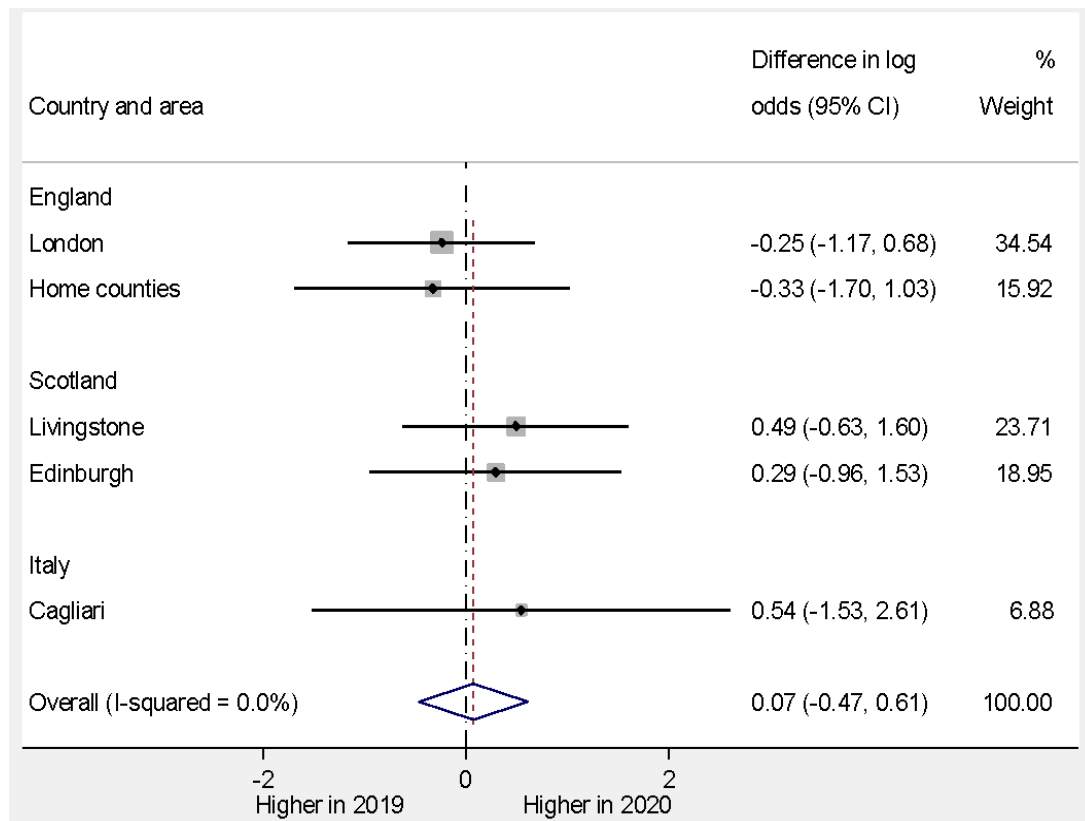

**Figure 20** Forest plot illustrating year differences in the proportion of children and adolescents with previous community self-harm out of all children and adolescents presenting with self-harm

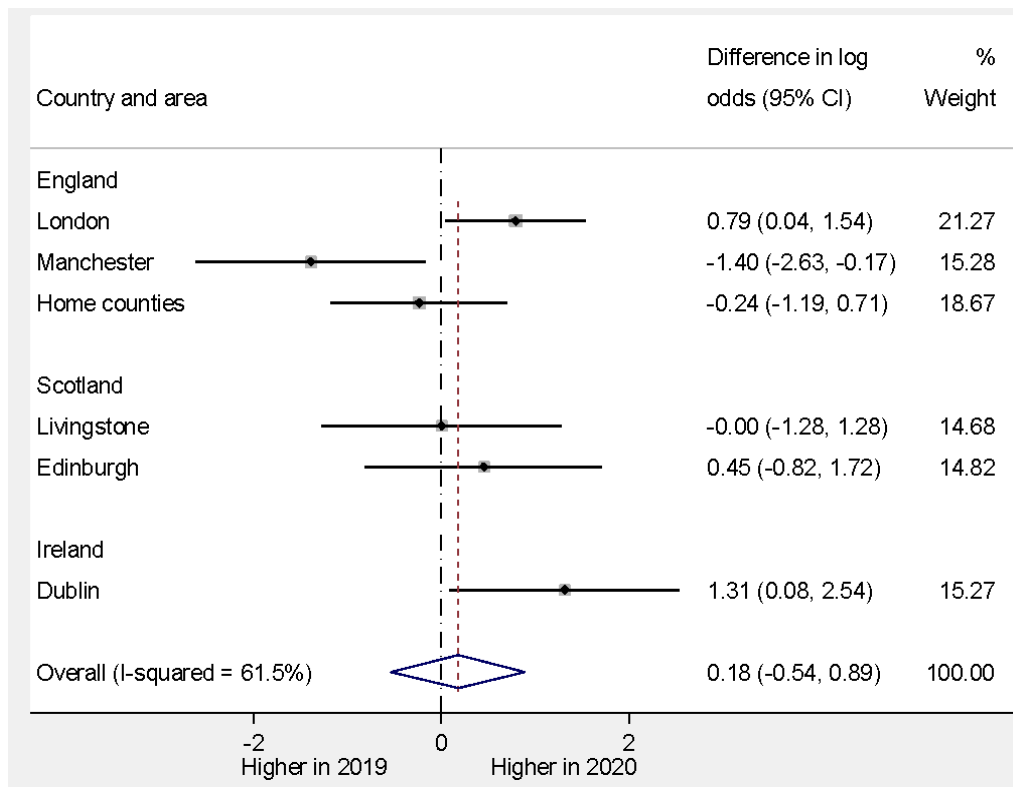

**Figure 21** Forest plot illustrating year differences in the proportion of children and adolescents with previous psychiatric inpatient treatment out of all children and adolescents presenting with self-harm

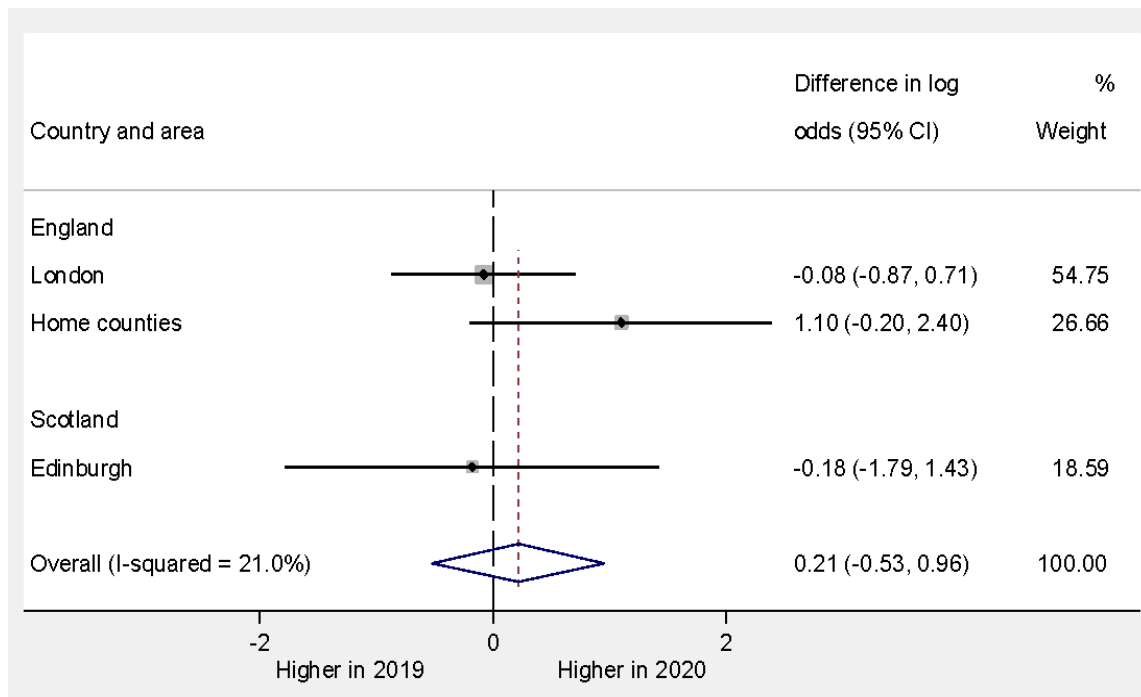

**Figure 22** Forest plot illustrating year differences in the proportion of children and adolescents with a family history of self-harm out of all children and adolescents presenting with self-harm

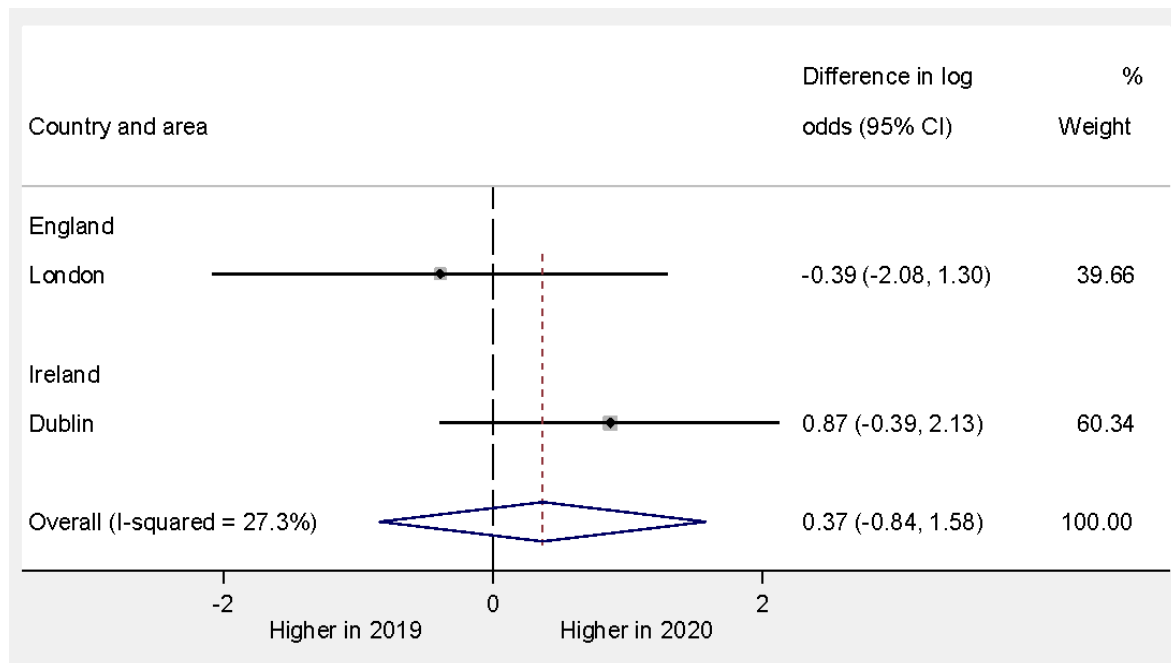

## CLINICAL MANAGEMENT OF CHILDREN AND ADOLESCENTS PRESENTING WITH SELF-HARM

**Figure 23** Forest plot illustrating year differences in the length of stay in hospital (one day or longer) in children and adolescents presenting with self-harm

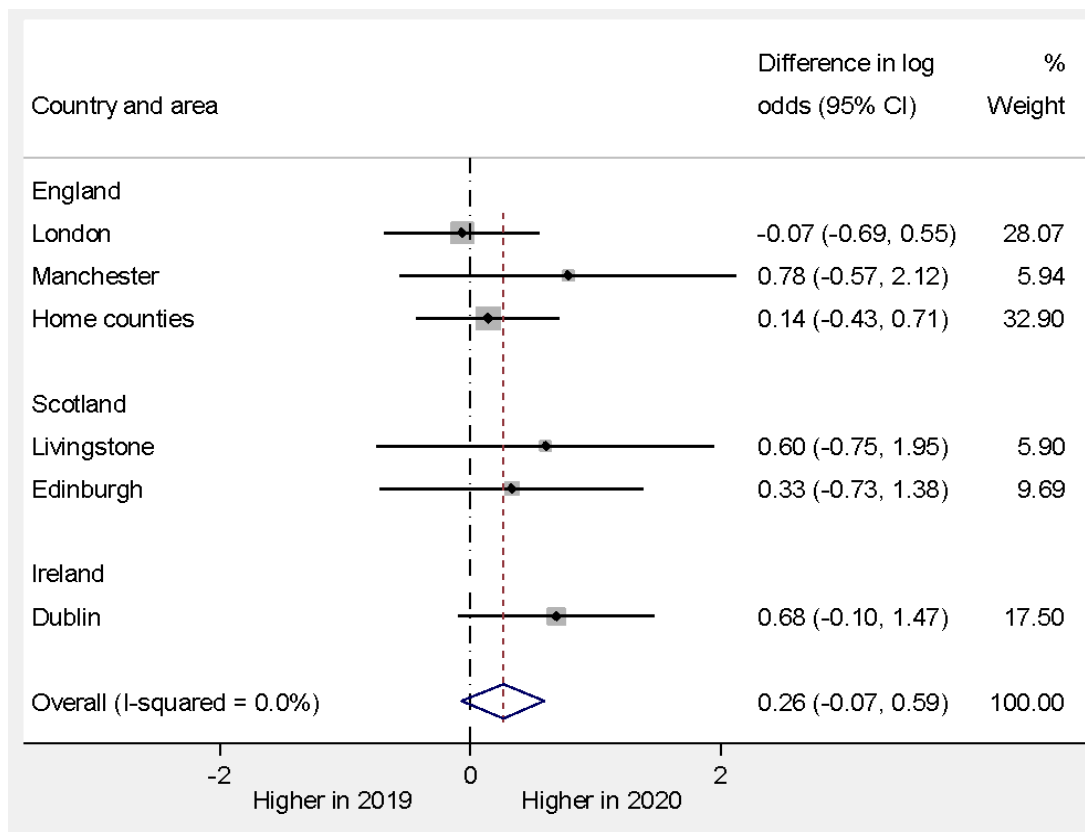

**Figure 24** Forest plot illustrating year differences in the proportion of children and adolescents admitted to an acute ward out of all children and adolescents presenting with self-harm

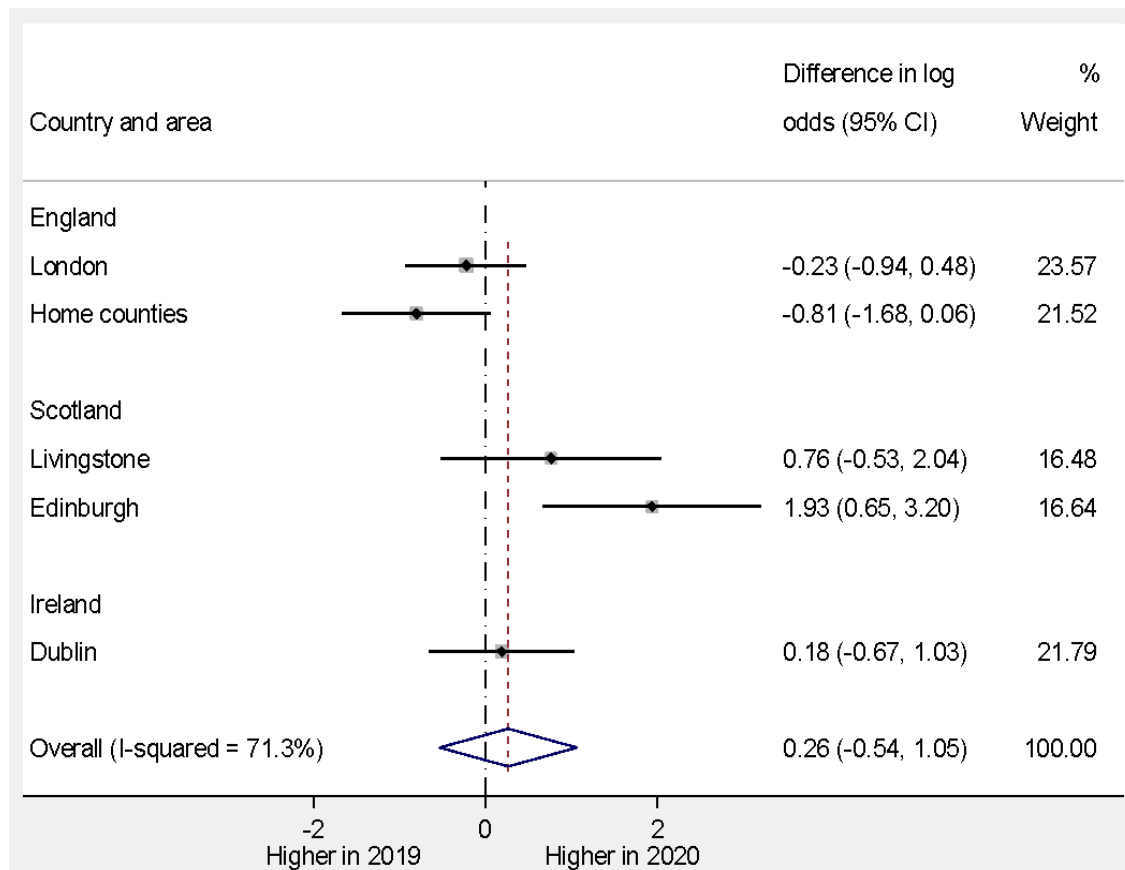

**Figure 25** Forest plot illustrating year differences in the proportion of children and adolescents admitted a psychiatric ward out of all children and adolescents presenting with self-harm

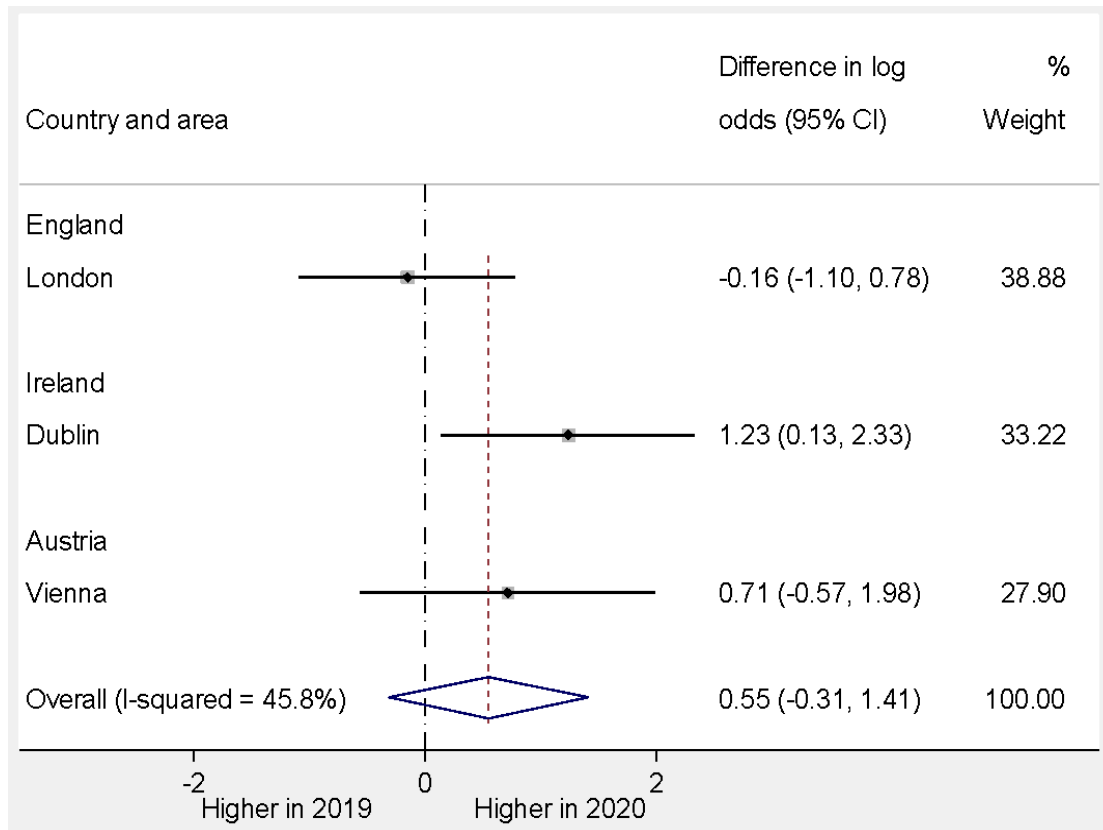



**Figure 26** Forest plot illustrating year differences in the proportion of children and adolescents offered community follow-up within seven working days out of all children and adolescents presenting with self-harm

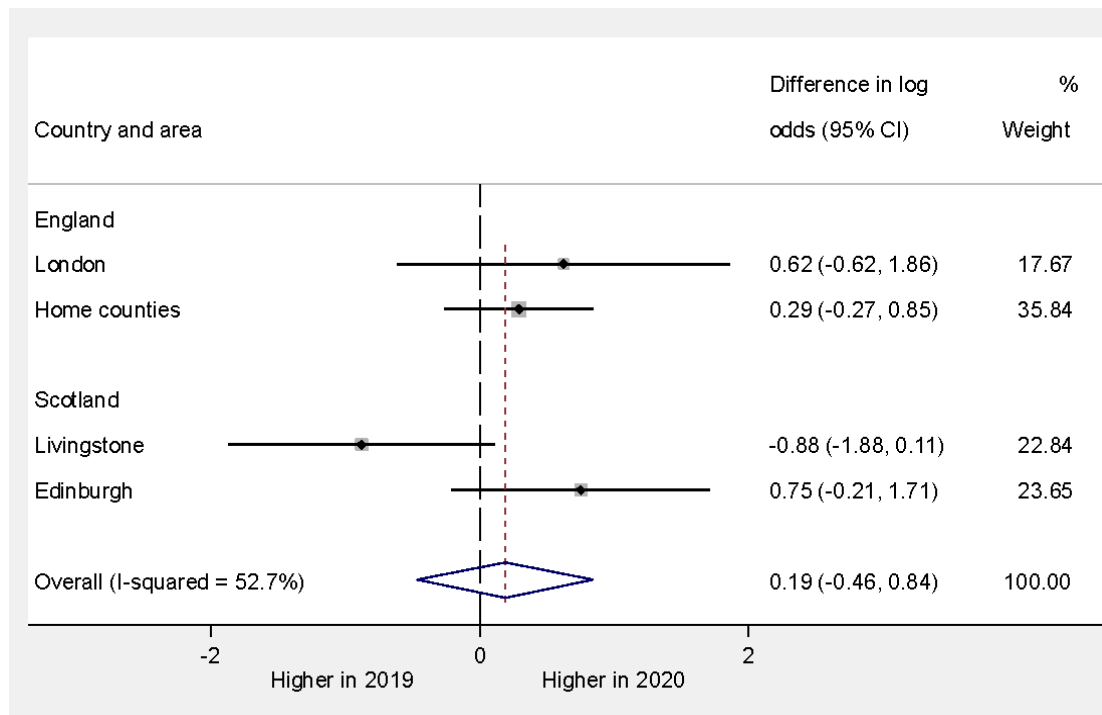

**Figure 27** Forest plot illustrating year differences in the proportion of children and adolescents who attended community follow-up within seven working days out of all children and adolescents presenting with self-harm who were offered follow-up

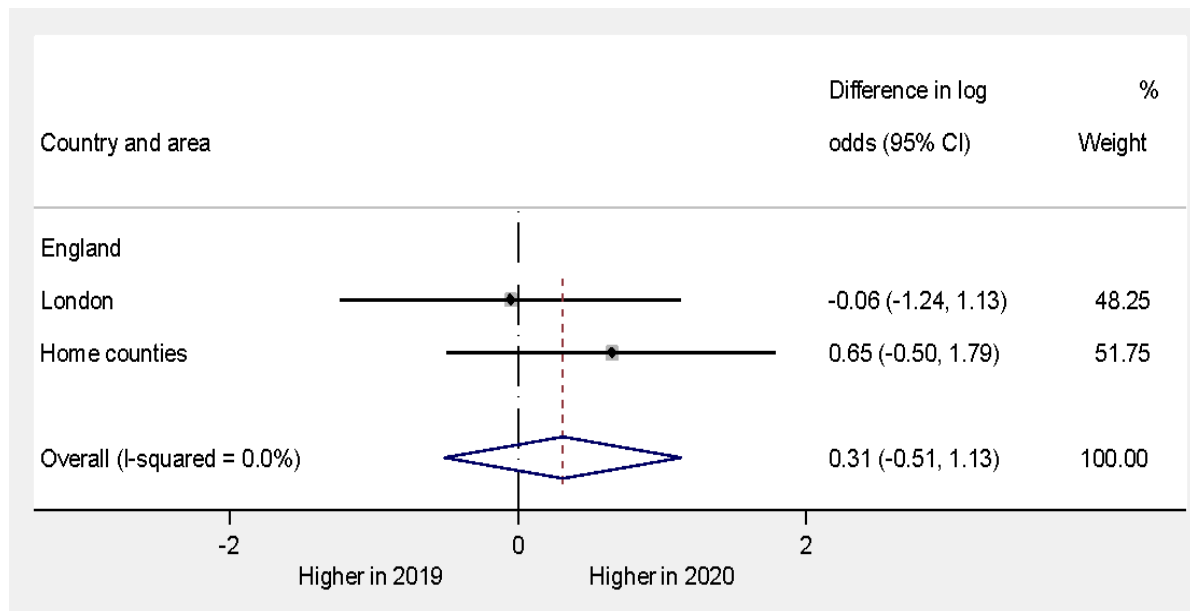

**Figure 28** Forest plot illustrating year differences in the proportion of children and adolescents with previous self-harm presentations

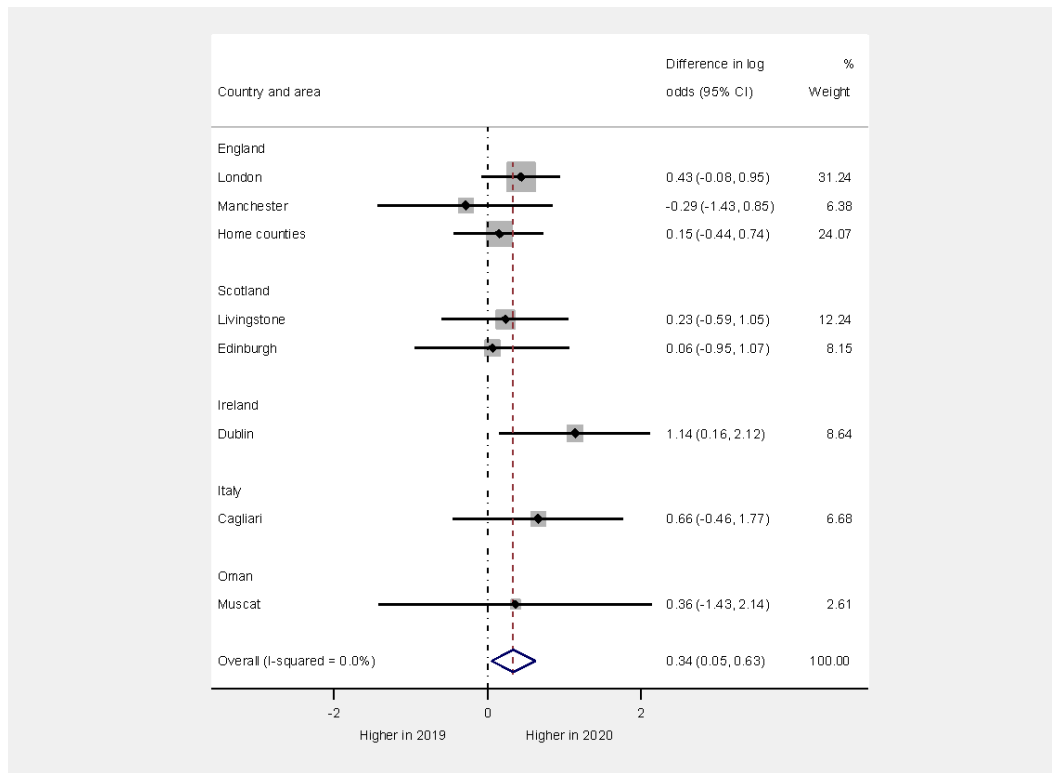

Supplement: 787_2021_1741_MOESM1_ESM.pdf [file 787_2021_1741_MOESM1_ESM.pdf]
